# Supplementary material for: Domestication and Divergence of Saccharomyces cerevisiae Beer Yeasts
Source: PubMed Central journal article supplement — Cell. 2016 Sep 8;166(6):1397–1410.e16. doi: 10.1016/j.cell.2016.08.020 (PMC5018251; doi:10.1016/j.cell.2016.08.020), 2016-09-08
Supplement: mmc8.pdf [file mmc8.pdf]

**Supplemental Table S8**

|                        | <b>Britain</b> | <b>US</b> | <b>Belgium/Germany</b> | <b>Mixed</b> | <b>Wine</b> | <b>Beer 2</b> |
|------------------------|----------------|-----------|------------------------|--------------|-------------|---------------|
| <b>US</b>              | 1.97E-03       |           |                        |              |             |               |
| <b>Belgium/Germany</b> | 2.10E-03       | 2.26E-03  |                        |              |             |               |
| <b>Mixed</b>           | 2.34E-03       | 2.51E-03  | 2.41E-03               |              |             |               |
| <b>Wine</b>            | 2.39E-03       | 2.51E-03  | 2.54E-03               | 2.34E-03     |             |               |
| <b>Beer 2</b>          | 2.53E-03       | 2.68E-03  | 2.66E-03               | 2.46E-03     | 1.68E-03    |               |
| <b>Asia</b>            | 3.65E-03       | 3.75E-03  | 3.60E-03               | 3.18E-03     | 4.33E-03    | 4.00E-03      |
